# Supplementary material
Source: Research Square preprint supplement (doi:10.21203/rs.3.rs-8911112/v1)
Supplement: Supplementary file 1 [file f9e6683549a7ce7bc57c8a98.docx]

**Microtubules are not passive load-bearing elements in axon growth**

Lorenzo Da Palmata1*, Tiziana Julia Nadjeschda Schmidt1*, Allegra Coppini1, Francesco Simoni1, Elena Landi1, Matteo Coppoletta1, Peter Blümler2, Jesús Antonio Fuentes García3, Gerardo F. Goya4, Laura Marchetti5, Vittoria Raffa1

1. Department of Biology, Università di Pisa, 56127, Pisa, Italy
2. Department of Physics, Johannes Gutenberg-University Mainz, 55128, Mainz, Germany
3. Instituto de Nanociencia y Materiales de Aragón (INMA), CSIC-Universidad de Zaragoza, Zaragoza 50009, Spain
4. Instituto de Nanociencia y Materiales de Aragón (INMA), Universidad de Zaragoza, Zaragoza 50009, Spain
5. Department of Pharmacy, Università di Pisa, 56126, Pisa, Italy

* Equally contributing

**Supplementary text**

**Validation of protein conjugation was confirmed by Fourier-transform infrared (FTIR) spectroscopy**

The FTIR spectra from the bare MNPs, the proteins as blank (GFP–Mms6 and Lck–GFP–Mms6), the conjugated GFP–Mms6:MNPs and Lck–GFP–Mms6:MNPs are presented in Figure 3I. The detected normal modes from the Bare MNPs samples synthesized via ammonium hydroxide co-precipitation reflects a highly hydroxylated and chemically active surface. The broad and intense absorption band at 3357 cm⁻¹ is attributed to the stretching vibrations of surface-bonded hydroxyl groups (Fe–OH) and the O–H stretching of physiosorbed water molecules, potentially overlapped by N–H stretching modes from residual ammonium species (red asterisk).1 Crucially, the band at 950 cm⁻¹ is assigned to the bending modes of surface Fe–OH groups or the coordination of NH4+ ions to the iron centers, indicating a surface ready for ligand exchange (orange asterisk). Finally, the dominant peak at 650 cm⁻¹ represents the characteristic Fe–O lattice vibrations in the tetrahedral and octahedral sites of the spinel structure, confirming the formation of a well-defined crystalline iron oxide core (green asterisk).2

The characteristic normal modes of vibration from both recombinant proteins GFP–Mms6 and Lck–GFP–Mms6 displayed typical protein-related absorption bands: the amide A band (3265–3291 cm⁻¹, AA), indicative of hydrogen bonding; the amide B band (2850–3000 cm⁻¹, AB), associated with asymmetric stretching vibrations of CH and NH groups; the amide I band (1620–1660 cm⁻¹, AIl), reflecting protein secondary structure and commonly attributed to β-sheet components; and the amide II band (1480–1575 cm⁻¹, AII), arising from C=O stretching coupled with NH bending and CN stretching modes. Additional prominent peaks at 1038 and 1102 cm⁻¹ were observed and are likely attributable to C–O stretching vibrations within peptide chains (black asterisk).3,4

The comparative FTIR analysis provides compelling evidence of the interfacial reorganization occurring upon protein attachment. The pristine nanoparticles exhibited a signature profile characterized by bands at 3357 and 1629 cm⁻¹ (O-H stretching and bending of physiosorbed water) and a distinct feature at 950 cm⁻¹ (Fe–OH deformation modes) or residual ammonium species from the synthesis process. Following the conjugation of GFP-Mms6 and Lck-GFP-Mms6, a slight spectral shift from 950 to 1035 cm⁻¹ was observed (magenta asterisk). This transition is diagnostic of the displacement of labile surface hydroxyls by the robust anchoring of the Mms6 domain, likely through the coordination of its acidic clusters with the iron centers. Furthermore, the emergence of the 775 cm⁻¹ band (violet asterisk), absent in the bare particles, confirms the establishment of specific protein-surface interactions. Even the functionalization process reduces the contributions from the available functional groups for vibration, the persistence of slight contributions of the AI and AII regions overlapping with the Fe–O validates that the nanoparticles were not merely coated, but chemically functionalized with biologically active constructs that retain their native-like β-barrel conformation.5–7

**Supplementary Figures and Tables**


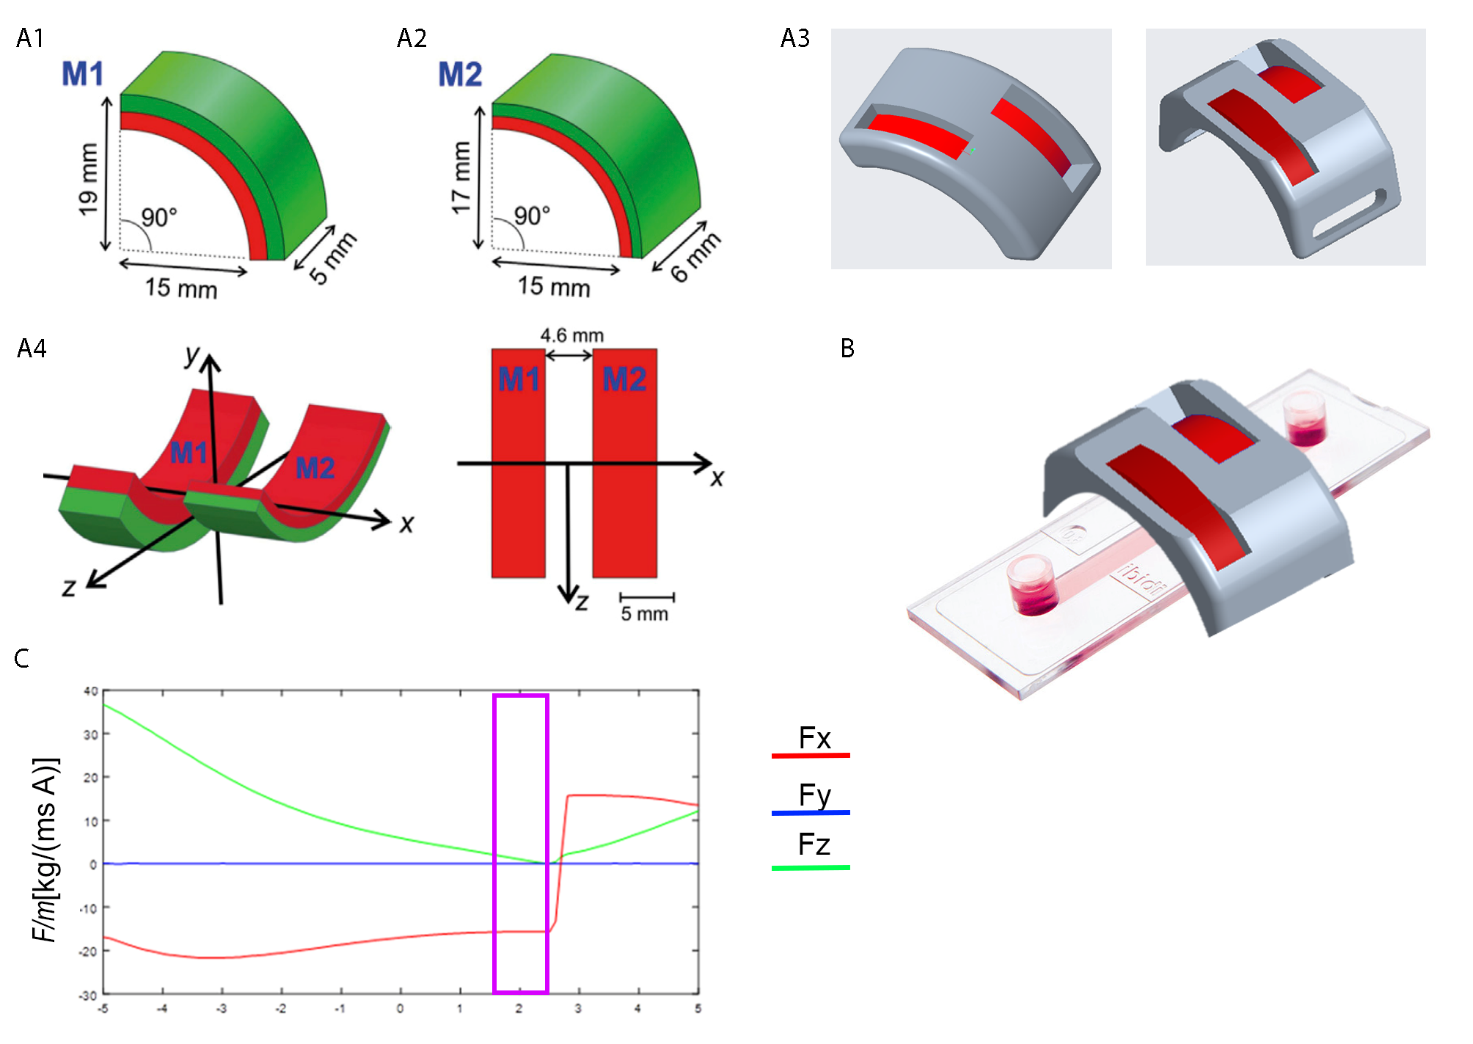


***Figure S1.*** *Bridge applicator. The bridge applicator consists of 2 magnets: magnet 1 (M1) has a depth of 5 mm (A1), magnet 2 (M2) has a depth of 6 mm (A2). Both magnets have an inner radius of 15 mm. The distance between the two magnets is 4.6 mm (A4). The holder was realized using Creo software, PTC Creo version 8.0 (<https://www.ptc.com/it>) (A3), and then printed by 3D printing as described in.8 The bridge applicator was used to stimulate neurons growing the microcentral channel of the IBIDI chamber (B) and pictures have been acquired in the ROI showed in the magenta rectangle (C) where* (*d|B|/dx* ≈ 20 T m-1, whereas *d|B|/dy, d|B|/dz* ≈ 0). *Additional details are provided in.8,9*

*
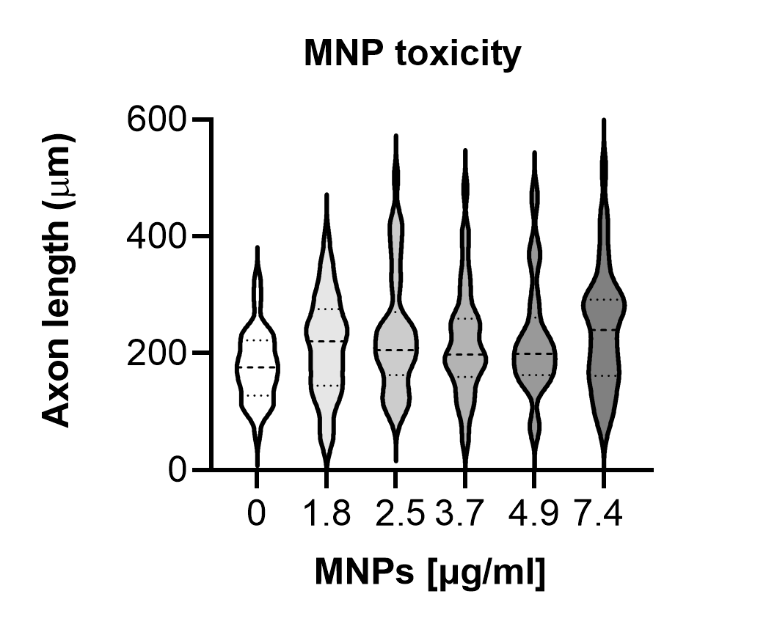
*

***Figure S2.*** *Toxicity assay of the bare MNPs. Mean axon length of TUBBIII-positive neurons incubated with MNPs from DIV0 to DIV3. One-way ANOVA, n=60 images from 3 biological replicates, Kruskal-Wallis test, p = 0.14, Kruskal-Wallis statistic: 8.244.*


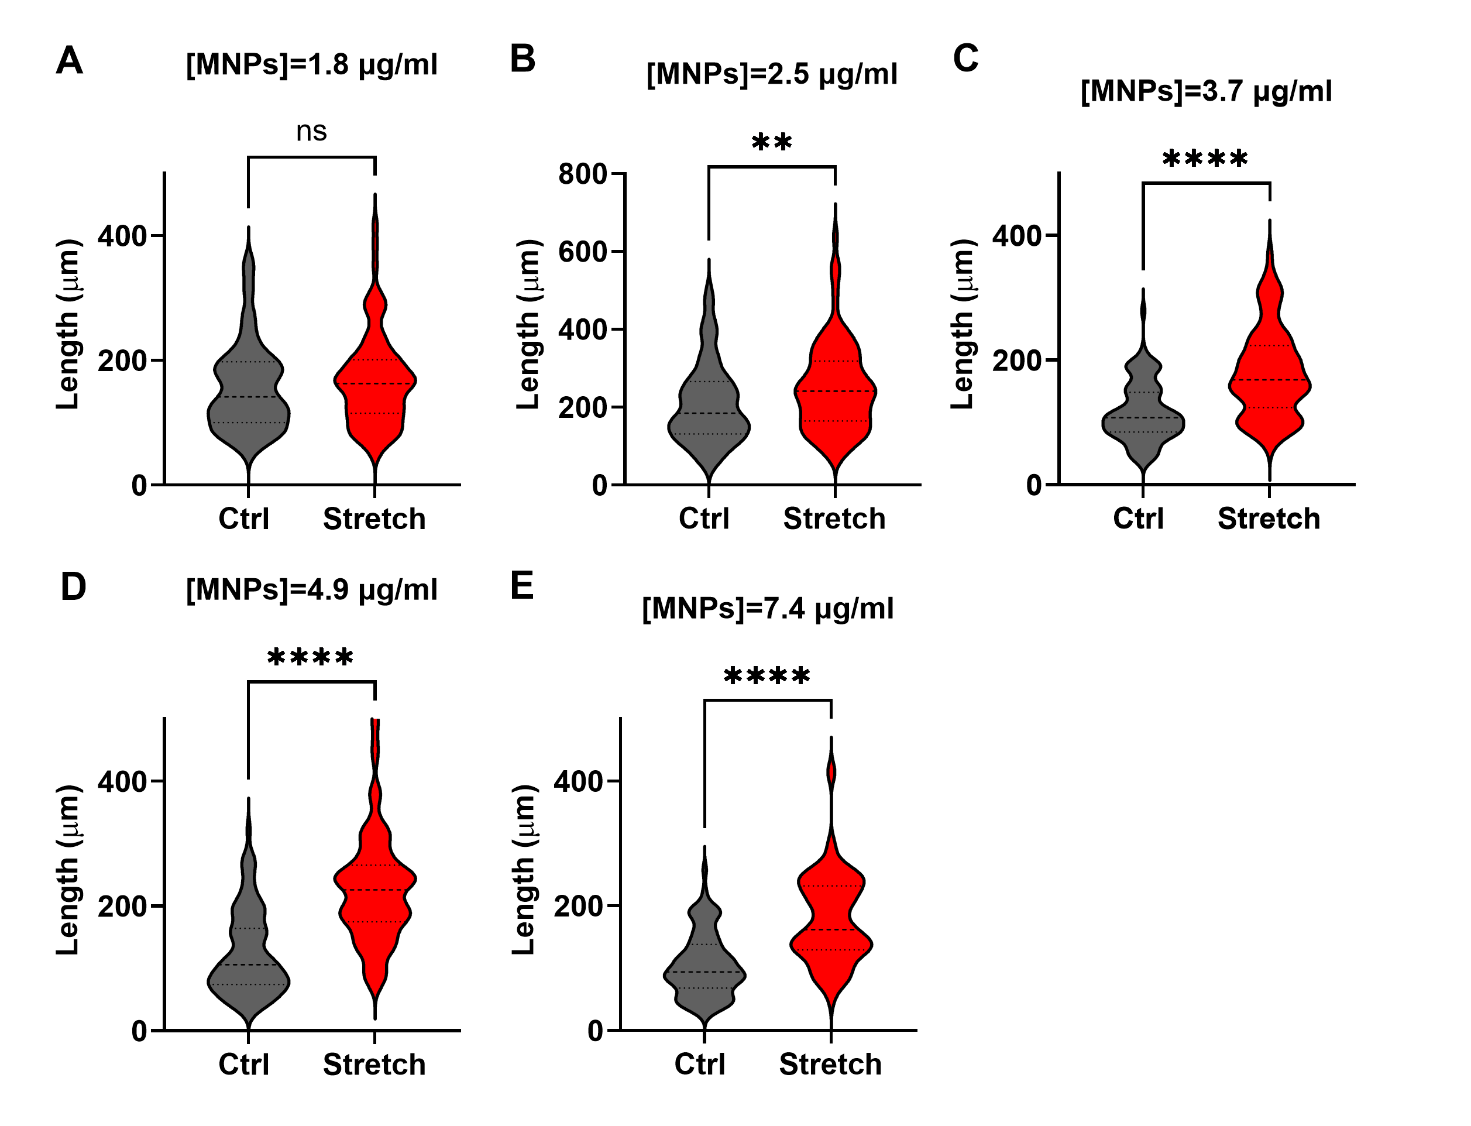


***Figure S3. Stretch-growth assay in hippocampal neurons incubated with different concentrations of home-made MNPs.*** *Violin plot, n=90 neurites from 3 biological replicates, Mann Whitney test. A) p = 0.31, Mann-Whitney U=3244, B) p = 0.0071, Mann-Whitney U=3075, C) p < 0.0001, Mann-Whitney U=1842, D) p = 0.0071, Mann-Whitney U=1289, E) p = 0.0071, Mann-Whitney U=1492.*

*
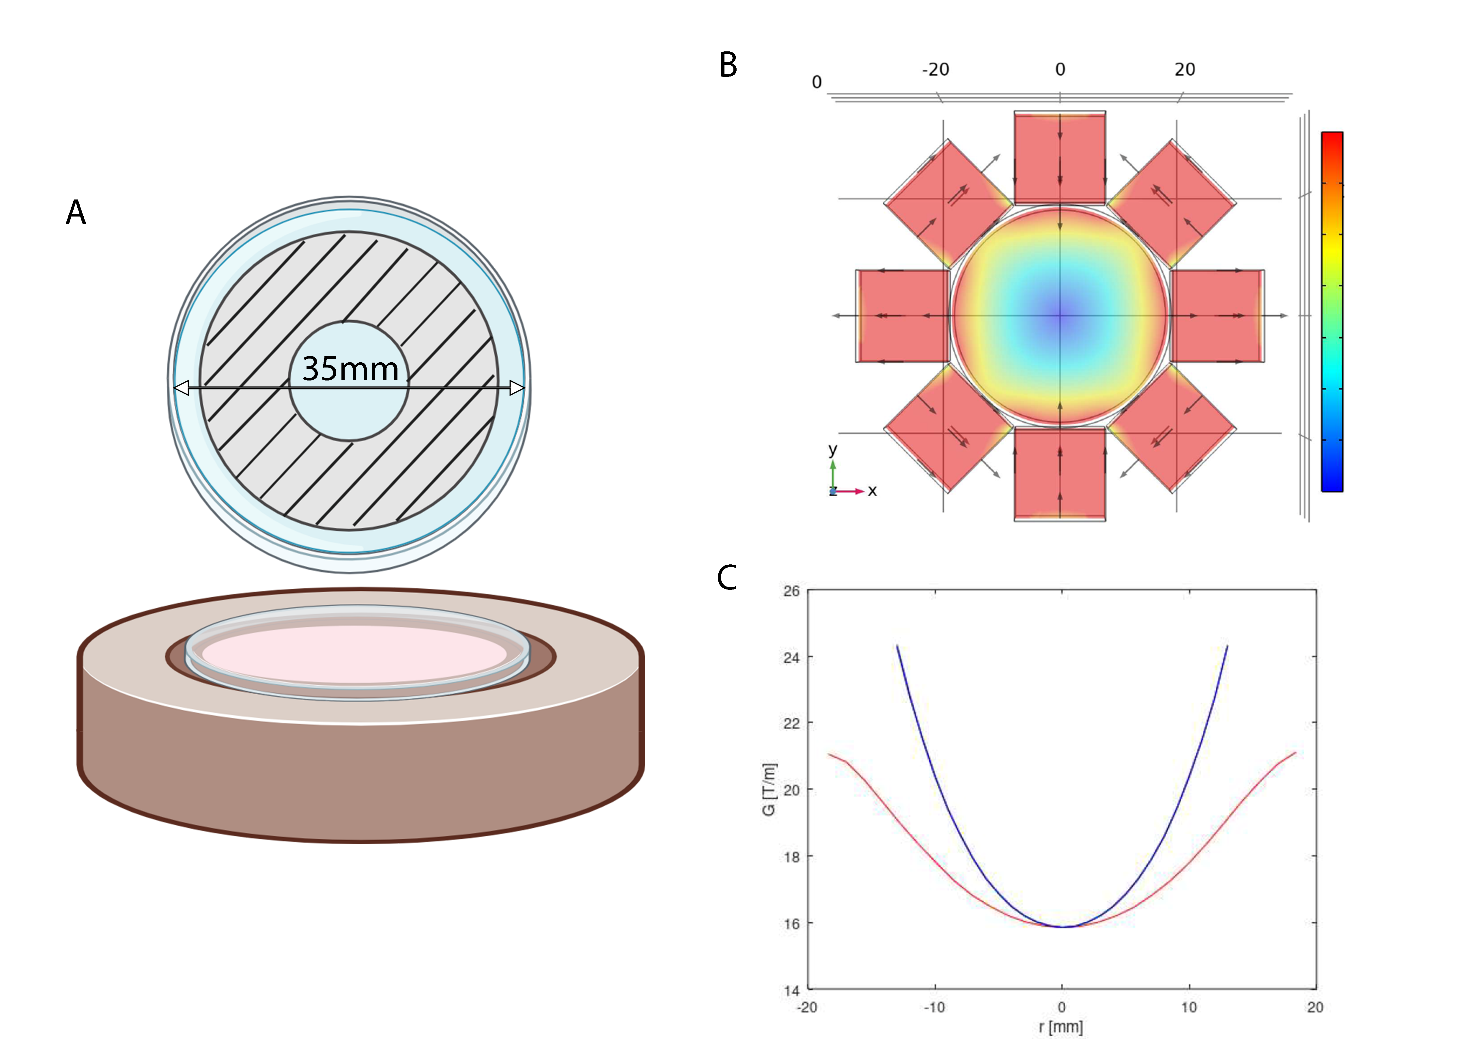
*

***Figure S4.*** *Cylindrical**Halbach quadrupole applicator. A) The magnet has an inner hole to host a 35 mm Petri dish. Images have been acquired in the dashed area. B) The magnet consists of eight cubical FeNdB magnets (grade N42, side length 20 mm). The black arrows indicate their magnetization directions. The graph shows the simulated (3D COMSOL Multiphysics 6.2) field magnitude, |B|, in the central region. The values are color coded as shown by the colorbar on the right with stretches from 0 to 0.7 T; the x axis is in mm. C) Gradient of |B| along the x- and y-axes (blue/black) and on the diagonals (red) in the central plane.*

**Supplementary table 1. Key resources table**

| REAGENT or RESOURCE | SOURCE | IDENTIFIER |
| --- | --- | --- |
| Antibodies and staining dyes | | |
| Mouse monoclonal anti-TUBBIII | Sigma-Aldrich | #T8578  RRID:AB_1841228 |
| Acetylated TUBA | Sigma-Aldrich | # T7451  RRID:AB_609894 |
| Tyrosinated TUBA | Abcam | # ab6160  RRID:AB_305328 |
| Mouse monoclonal anti-Polyglutamylated Tubulin | Adipogen | # GT335  RRID:AB_2490210 |
| Rabbit polyclonal anti-Polyglutamate chain (poliE) | Adipogen | #IN105  RRID:AB_ 2490998 |
| Mouse monoclonal anti-GFP | Merck | #G6539  RRID:AB_259941 |
| Goat polyclonal anti-Mouse, Alexa fluor 488 | Thermo Fisher Scientific | #A11029  RRID:AB_2534088 |
| Goat polyclonal anti-Rat, Alexa Fluor 568 | Thermo Fisher Scientific | #A11077  RRID:AB_2534121 |
| Goat polyclonal anti-Rabbit, Alexa Fluor 568 | Thermo Fisher Scientific | #A11011  RRID:AB_143157 |
| Goat polyclonal anti-Chicken, Alexa Fluor 647 | Thermo Fisher Scientific | #A21449  RRID:AB_1500594 |
| Rabbit anti-mouse IgG | Sigma-Aldrich | #A9044  RRID:AB_258431 |
| Hoechst 33342 | Thermo Fisher Scientific | #H3570 |
| Anti-6xHis | AbCam | #ab18184 |
| Anti-mouse_HRP | Merck | #A9044 |
| Chemicals, peptides, and recombinant proteins | | |
| Poly-L-lysine | Sigma-Aldrich | #P4707 |
| DPBS | Thermo Fisher Scientific | #14190-094 |
| DMEM | Thermo Fisher Scientific | #21063-029 |
| FBS | Thermo Fisher Scientific | #10270-106 |
| Penicillin/Streptomycin | Thermo Fisher Scientific | #15140-122 |
| Glutamax | Thermo Fisher Scientific | #35050-038 |
| Neurobasal-A medium | Thermo Fisher Scientific | #12348-017 |
| B27 | Thermo Fisher Scientific | #17504-044 |
| D-glucose | Thermo Fisher Scientific | #14190-094 |
| Nocodazole | Sigma-Aldrich | #SML1665 |
| Cytosine β-D-arabinofuranoside | Sigma-Aldrich | #C1768 |
| NGF | Sigma-Aldrich | #N5415 |
| Lipofectamine 2000 | Invitrogen | #11668 |
| IPTG | Merck KGaA | #15502 |
| FeCl3·6H2O |  | #44944 |
| FeCl2·4H2O | Sigma-Aldrich Sigma-Aldrich | #44939 |
| NH4OH | Sigma-Aldrich | #221228 |
| HNO3 | Sigma-Aldrich | #84378 |
| Lysozyme | Sigma-Aldrich | #L-2879 |
| BSA | Sigma-Aldrich | #A7906 |
| Tween | Sigma-Aldrich | #P1379 |
| Critical commercial assays | | |
| Pierce™ BCA Protein Assay Kits | Thermo Fisher Scientific | #23225 |
| Plasmid DNA extraction kit | Macherey-Nagel | #740412 |
| Iron detection kit | Bioassay Systems | #DIFE-250 |
| Triton X-100 | Merck | #T8787 |
| Clarity Max™ Western ECL Substrate, | Bio-Rad | #1705060 |
| HisPur™ Ni-NTA Resin | Thermo Fisher Scientific | #88221 |
| Experimental models: Organisms/strains | | |
| Mouse: C57BL/6J | Charles River | 027C57BL/6 |
| E. coli Rosetta DE3pLys cells | Thermo Fisher  Scientific | #C606003 |
| PC12 cells | ATCC | #PC-12 - CRL-1721 |
| Vectors | | |
| Lck-GFP | Addgene | #61099 |
| pet21α:His6:mEGFP:ΔNMms6 | From Prof. Dr. J. Piehler (Biophysics, University of Osnabrück, Germany) |  |
| pTagRFP-EB3 vector | Evrogen | #FP365 |
| Tet-on lentiviral vector | From Prof. Dr. I. Barde, CNSR, France | Protocol adapted from10,11 |
| Software and algorithms | | |
| ImageJ | 53 | <https://imagej.nih.gov/ij/> |
| NeuronJ | ImageJ plugin12 | <https://imagescience.org/meijering/software/neuronj/> |
| KymoAnalizer | ImageJ plugin13 | <https://github.com/encaladawebsite/KymoAnalyzer>13 |
| Neurolucida 360 | MBF Bioscience | <https://www.mbfbioscience.com/products/neurolucida-360> |
| Neurolucida Explorer, product for Neurolucida 360 | MBF Bioscience | <https://www.mbfbioscience.com/products/neurolucida-explorer> |
| GraphPad software, version 10.0 | GraphPad | <https://www.graphpad.com/scientific-software/prism/> |
| ChemiDoc™ Molecular Imager | Bio-Rad |  |
| Finite-element simulations (FEM) | COMSOL Multiphysics, version 6.1 | Details in8,9 |
| Other | | |
| Nanoparticles | Chemicell | #4115 |
| Microfluidic devices- µ-Slide I | Ibidi | #80106 |
| Coverslip | Sarstedt | #83.1840.002 |
| Halbach-like cylinder magnetic applicator | Validated in14–16 | N/A |
| Bridge magnetic applicator | Validated in8 | N/A |
| Centricon Plus 10-kDa cutoff | Millipore | #UFC701008 |
| Invision Stain | Invitrogen | #LC6030 |
| Nitrocellulose membranes | Amersham | #1060003 |

**Bibliography**

1. Sundar, S., Mariappan, R. & Piraman, S. Synthesis and characterization of amine modified magnetite nanoparticles as carriers of curcumin-anticancer drug. *Powder Technol.* **266**, 321–328 (2014).

2. Stoia, M., Istratie, R. & Păcurariu, C. Investigation of magnetite nanoparticles stability in air by thermal analysis and FTIR spectroscopy. *J. Therm. Anal. Calorim.* **125**, 1185–1198 (2016).

3. Barth, A. Infrared spectroscopy of proteins. *Biochimica et Biophysica Acta (BBA) - Bioenergetics* **1767**, 1073–1101 (2007).

4. Haris, P. I. & Severcan, F. FTIR spectroscopic characterization of protein structure in aqueous and non-aqueous media. *J. Mol. Catal. B Enzym.* **7**, 207–221 (1999).

5. Prozorov, T. *et al.* Protein‐Mediated Synthesis of Uniform Superparamagnetic Magnetite Nanocrystals. *Adv. Funct. Mater.* **17**, 951–957 (2007).

6. Arakaki, A., Webb, J. & Matsunaga, T. A Novel Protein Tightly Bound to Bacterial Magnetic Particles in Magnetospirillum magneticum Strain AMB-1. *Journal of Biological Chemistry* **278**, 8745–8750 (2003).

7. Schwaminger, S. P. *et al.* Nature of Interactions of Amino Acids with Bare Magnetite Nanoparticles. *The Journal of Physical Chemistry C* **119**, 23032–23041 (2015).

8. De Vincentiis, S. *et al.* 3D-printed weight holders design and testing in mouse models of spinal cord injury. *Frontiers in Drug Delivery* **4**, (2024).

9. Blümler, P., Raudzus, F. & Schmid, F. A comprehensive approach to characterize navigation instruments for magnetic guidance in biological systems. *Sci. Rep.* **14**, 7879 (2024).

10. Barde, I. *et al.* Efficient control of gene expression in the hematopoietic system using a single Tet-on inducible lentiviral vector. *Molecular Therapy* **13**, 382–390 (2006).

11. Gobbo, F., Bonsignore, F., Amodeo, R., Cattaneo, A. & Marchetti, L. Site-Specific Direct Labeling of Neurotrophins and Their Receptors: From Biochemistry to Advanced Imaging Applications. in 295–314 (2018). doi:10.1007/978-1-4939-7571-6_22.

12. Popko, J., Fernandes, A., Brites, D. & Lanier, L. M. Automated analysis of NeuronJ tracing data. *Cytometry Part A* **75A**, 371–376 (2009).

13. Neumann, S., Chassefeyre, R., Campbell, G. E. & Encalada, S. E. <scp>KymoAnalyzer</scp> : a software tool for the quantitative analysis of intracellular transport in neurons. *Traffic* **18**, 71–88 (2017).

14. Raffa, V. *et al.* Piconewton Mechanical Forces Promote Neurite Growth. *Biophys. J.* **115**, 2026–2033 (2018).

15. De Vincentiis, S. *et al.* Mechanical Forces Guide Axon Growth through the Nigrostriatal Pathway in an Organotypic Model. *Advanced Science* **12**, (2025).

16. Falconieri, A. *et al.* The extremely low mechanical force generated by nano-pulling induces global changes in the microtubule network, nuclear morphology, and chromatin transcription in neurons. Preprint at https://doi.org/10.1101/2025.03.09.641873 (2025).
